# Supplementary material
Source: PubMed Central journal article supplement (PMC3384710)
Supplement: NIHMS384778-supplement-1_si_001.pdf [file NIHMS384778-supplement-1_si_001.pdf]

**Supporting Information**

**Crystal Structure of an Activated Variant of Small Heat Shock  
Protein Hsp16.5**

*Hassane S. Mchaourab<sup>1\*</sup>, Yi-Lun Lin<sup>1</sup> and Benjamin W. Spiller<sup>2,3\*</sup>*

<sup>1</sup>Department of Molecular Physiology and Biophysics, Vanderbilt University  
Medical Center, TN 37232, USA

<sup>2</sup>Department of Pharmacology, Vanderbilt University Medical Center, TN 37232,  
USA

<sup>3</sup>Department of Pathology, Microbiology and Immunology, Vanderbilt University  
Medical Center, TN 37232, USA

Running Title: Structural Basis of Hsp16.5 Oligomer Expansion

\* To whom correspondence may be addressed: Hassane S. Mchaourab, Phone: (615) 322-3307. Fax: (615) 322-7236. [hassane.mchaourab@vanderbilt.edu](mailto:hassane.mchaourab@vanderbilt.edu); Benjamin W. Spiller, Phone: (615)322-6766. Fax: (615) 343-6532  
[Benjamin.spiller@vanderbilt.edu](mailto:Benjamin.spiller@vanderbilt.edu).



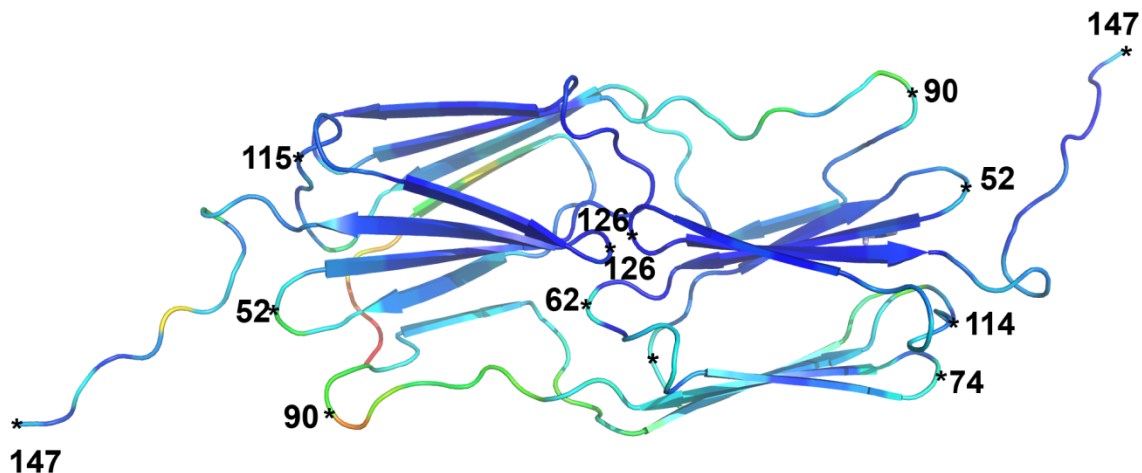

**Figure S3:** A ribbon diagram colored by B-factor of C $\alpha$  atoms. Lowest B-factors are dark blue, followed by light blue, green, orange, and red. This figure was prepared with Pymol (2, 3).

#### References:

1. Adams, P. D., Grosse-Kunstleve, R. W., Hung, L. W., Ioerger, T. R., McCoy, A. J., Moriarty, N. W., Read, R. J., Sacchettini, J. C., Sauter, N. K., and Terwilliger, T. C. (2002) PHENIX: building new software for automated crystallographic structure determination, *Acta Crystallogr D Biol Crystallogr* 58, 1948-1954.
2. DeLano, W. L. (2002) The PyMOL Molecular Graphics System, DeLano Scientific, San Carlos, CA.
3. Schrodinger, LLC. (2010) The PyMOL Molecular Graphics System, Version 1.3r1.
4. Gouet, P., Courcelle, E., Stuart, D. I., and Metz, F. (1999) ESPript: analysis of multiple sequence alignments in PostScript, *Bioinformatics* 15, 305-308.
5. Gouet, P., Robert, X., and Courcelle, E. (2003) ESPript/ENDscript: Extracting and rendering sequence and 3D information from atomic structures of proteins, *Nucleic Acids Res* 31, 3320-3323.
